# Supplementary material for: Mechanism of ionic dissociation of HCl in the smallest water clusters
Source: Royal Society of Chemistry journal article supplement (doi:10.1039/d3cp05715a), 2024-01-01
Supplement: d3cp05715a1.pdf [file d3cp05715a1.pdf]

## Supporting Information

### Mechanism of Ionic Dissociation of HCl in Smallest Water Clusters

Hiroto TACHIKAWA\*

*Division of Applied Chemistry, Faculty of Engineering*

*Hokkaido University, Sapporo 060-8628, JAPAN*

Email: hiroto@eng.hokudai.ac.jp

Table S1. Optimized geometrical parameters of  $\text{HCl}(\text{H}_2\text{O})_n$  ( $n=3-5$ ), calculated at all levels of theory.

| <b><i>n=3</i></b> |                   |                         |                       |
|-------------------|-------------------|-------------------------|-----------------------|
|                   | MP2/6-311++G(d,p) | CAM-B3LYP/6-311++G(d,p) | CAM-B3LYP/6-311G(d,p) |
| r1[Cl-O(W1)]      | 2.988             | 2.915                   | 2.808                 |
| r2[O(W1)-O(W2)]   | 2.727             | 2.671                   | 2.603                 |
| r3[O(W2)-O(W3)]   | 2.77              | 2.721                   | 2.681                 |
| r4[O(W3)-Cl]      | 3.308             | 3.258                   | 3.211                 |

  

| <b><i>n=4</i></b> |                   |                         |                       |
|-------------------|-------------------|-------------------------|-----------------------|
|                   | MP2/6-311++G(d,p) | CAM-B3LYP/6-311++G(d,p) | CAM-B3LYP/6-311G(d,p) |
| r1[Cl-O(W1)]      | 3.018             | 2.964                   | 2.881                 |
| r2[O(W1)-O(W2)]   | 2.647             | 2.598                   | 2.551                 |
| r3[O(W2)-O(W3)]   | 2.816             | 2.769                   | 2.742                 |
| r4[O(W3)-Cl]      | 3.375             | 3.327                   | 3.298                 |
| r5[O(W1)-O(W4)]   | 2.925             | 2.876                   | 2.848                 |

  

| <b><i>n=5</i></b> |                   |                         |                       |
|-------------------|-------------------|-------------------------|-----------------------|
|                   | MP2/6-311++G(d,p) | CAM-B3LYP/6-311++G(d,p) | CAM-B3LYP/6-311G(d,p) |
| r1[Cl-O(W1)]      | 3.092             | 3.091                   | 2.972                 |
| r2[O(W1)-O(W2)]   | 2.630             | 2.631                   | 2.604                 |
| r3[O(W2)-O(W3)]   | 2.656             | 2.656                   | 2.665                 |
| r4[O(W3)-O(W4)]   | 2.674             | 2.647                   | 2.914                 |
| r5[O(W3)-O(W5)]   | 2.744             | 2.647                   | 2.629                 |
| r6[O(W5)-Cl]      | 2.773             | 2.745                   | 2.62                  |

Table S2. Optimized geometrical parameters of solvent separated ion-pairs (ssIP) and contact ion-pair (cIP) for  $\text{H}^+\text{Cl}^-(\text{H}_2\text{O})_n$  ( $n=4$  and  $5$ ), calculated at all levels of theory.

| <b><math>n=4(\text{ssIP})</math></b>  |                   |                         |                       |
|---------------------------------------|-------------------|-------------------------|-----------------------|
|                                       | MP2/6-311++G(d,p) | CAM-B3LYP/6-311++G(d,p) | CAM-B3LYP/6-311G(d,p) |
| r1[Cl-O( $\text{H}_3\text{O}^+$ )]    | 3.497             | 3.544                   | 3.562                 |
| r2[Cl-O(W1)]                          | 3.004             | 3.020                   | 3.033                 |
| r2[Cl-O(W1)]                          | 3.004             | 3.022                   | 3.031                 |
| r1[O(W2)-O( $\text{H}_3\text{O}^+$ )] | 3.005             | 3.021                   | 3.032                 |

  

| <b><math>n=4(\text{cIP})</math></b>   |                   |                         |                       |
|---------------------------------------|-------------------|-------------------------|-----------------------|
|                                       | MP2/6-311++G(d,p) | CAM-B3LYP/6-311++G(d,p) | CAM-B3LYP/6-311G(d,p) |
| r1[Cl-O( $\text{H}_3\text{O}^+$ )]    | 2.773             | 2.840                   | 2.871                 |
| r2[Cl-O(W1)]                          | 3.112             | 3.112                   | 3.099                 |
| r3[O(W1)-O(W2)]                       | 2.672             | 2.672                   | 2.608                 |
| r1[O(W2)-O( $\text{H}_3\text{O}^+$ )] | 2.551             | 2.551                   | 2.488                 |

  

| <b><math>n=5(\text{ssIP})</math></b>  |                   |                         |                       |
|---------------------------------------|-------------------|-------------------------|-----------------------|
|                                       | MP2/6-311++G(d,p) | CAM-B3LYP/6-311++G(d,p) | CAM-B3LYP/6-311G(d,p) |
| r1[Cl-O( $\text{H}_3\text{O}^+$ )]    | 3.675             | 3.783                   | 3.768                 |
| r2[Cl-O(W1)]                          | 3.046             | 3.065                   | 3.071                 |
| r3[O(W1)-O(W2)]                       | 2.640             | 2.617                   | 2.604                 |
| r1[O(W2)-O( $\text{H}_3\text{O}^+$ )] | 2.527             | 2.522                   | 2.505                 |

  

| <b><math>n=5(\text{cIP})</math></b>   |                   |                         |                       |
|---------------------------------------|-------------------|-------------------------|-----------------------|
|                                       | MP2/6-311++G(d,p) | CAM-B3LYP/6-311++G(d,p) | CAM-B3LYP/6-311G(d,p) |
| r1[Cl-O( $\text{H}_3\text{O}^+$ )]    | 2.830             | 2.886                   | 2.910                 |
| r2[Cl-O(W1)]                          | 3.104             | 3.101                   | 3.108                 |
| r3[O(W1)-O(W2)]                       | 2.670             | 2.642                   | 2.626                 |
| r1[O(W2)-O( $\text{H}_3\text{O}^+$ )] | 2.558             | 2.540                   | 2.516                 |

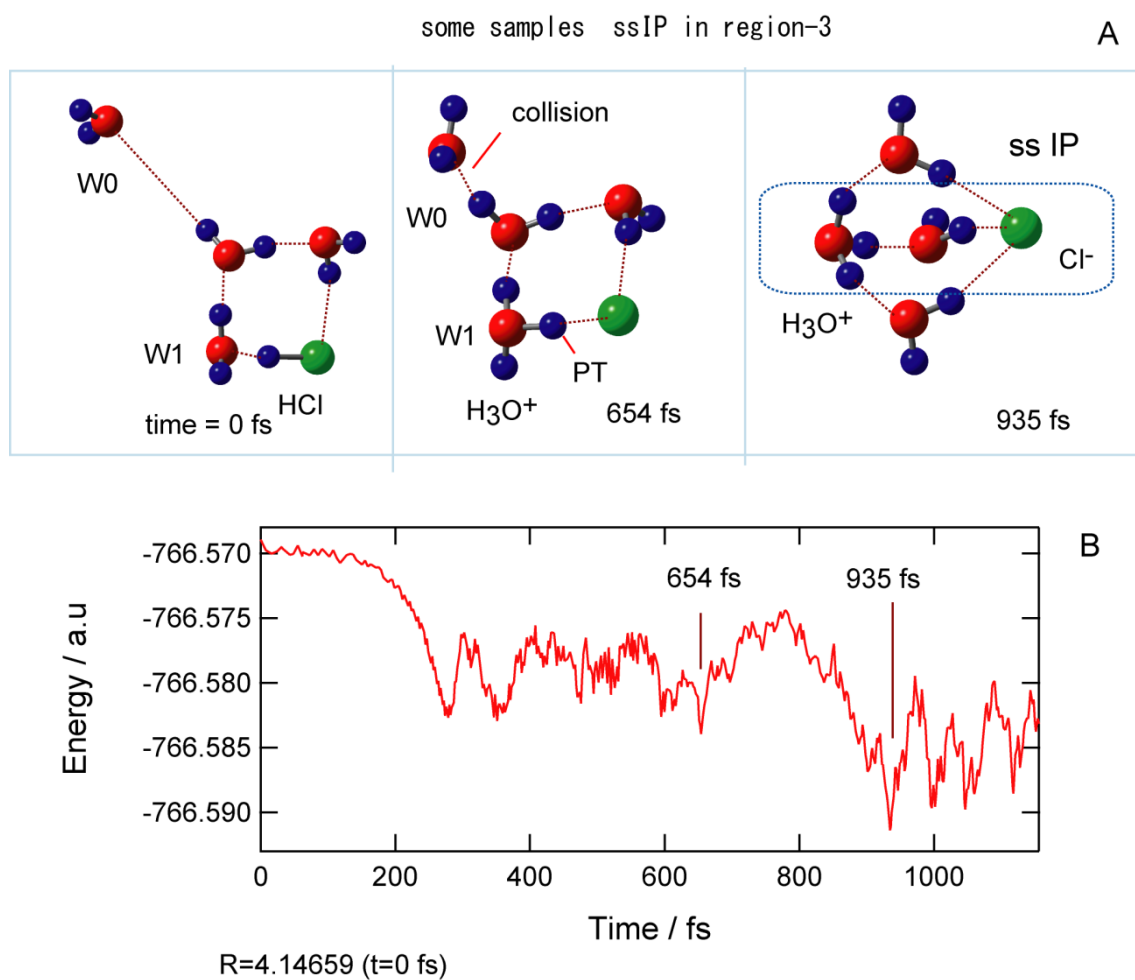

Figure S1. Sample trajectory for ssIP channel (sample-1): (A) Snapshots of  $\text{HCl}(\text{H}_2\text{O})_n + \text{H}_2\text{O}$  ( $n = 3+1$ ) reaction system given as a function of time, and (B) time evolutions of potential energy.  $\text{H}_2\text{O}(\text{W}0)$  approaches to HCl from region-III.

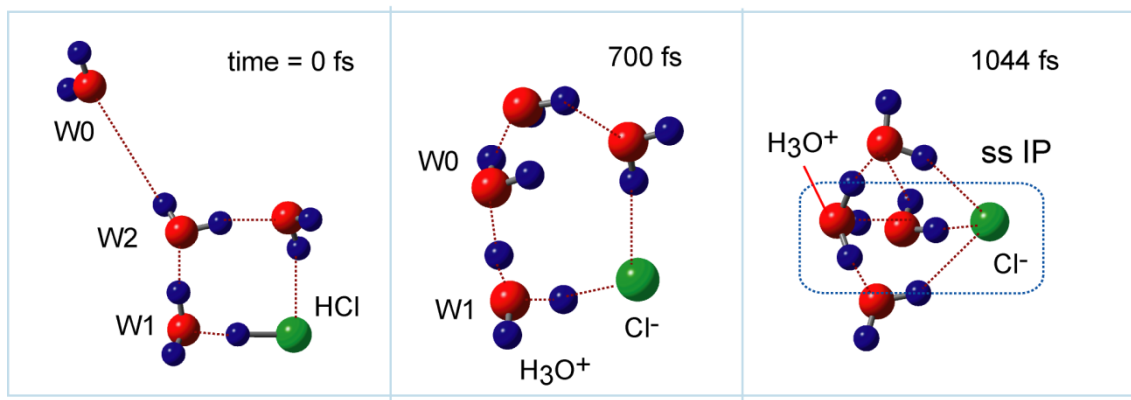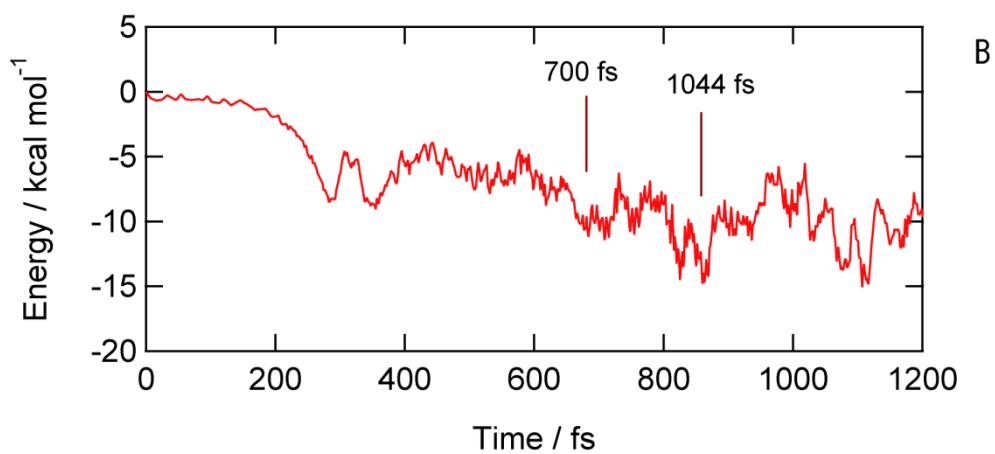

Figure S2. Sample trajectory for ssIP channel (sample-2): (A) Snapshots of HCl(H<sub>2</sub>O)<sub>n</sub> + H<sub>2</sub>O ( $n = 3+1$ ) reaction system given as a function of time, and (B) time evolutions of potential energy. H<sub>2</sub>O(W0) approaches to HCl from region-III.

some samples ssIP in region-3

A

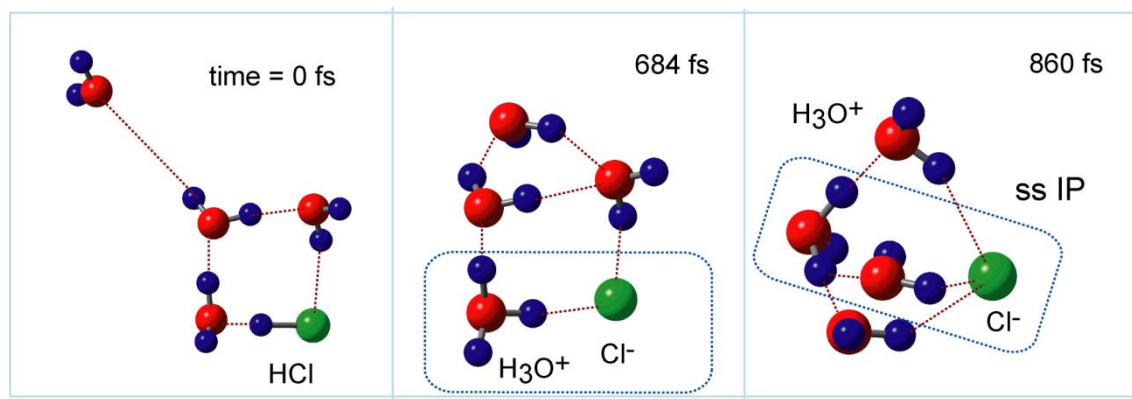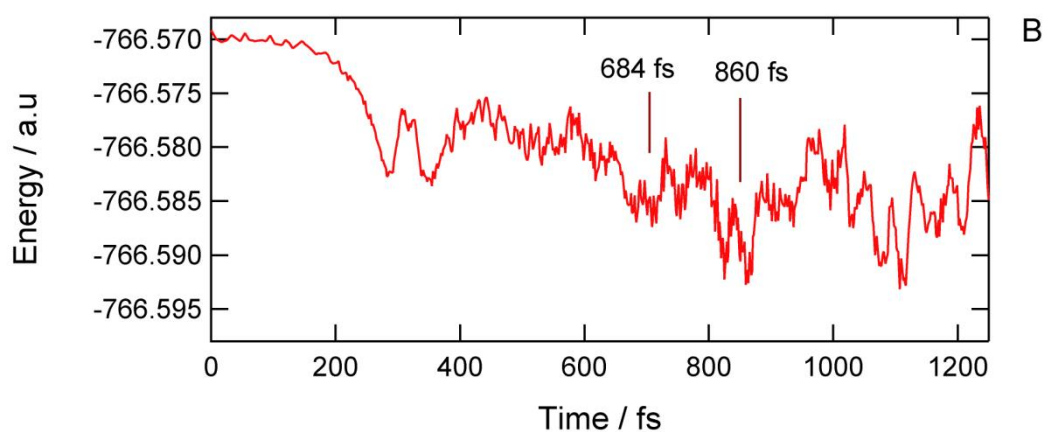

Figure S3. Sample trajectory for ssIP channel (sample-3): (A) Snapshots of  $\text{HCl}(\text{H}_2\text{O})_n + \text{H}_2\text{O}$  ( $n = 3+1$ ) reaction system given as a function of time, and (B) time evolutions of potential energy.  $\text{H}_2\text{O}(\text{W0})$  approaches to HCl from region-III.

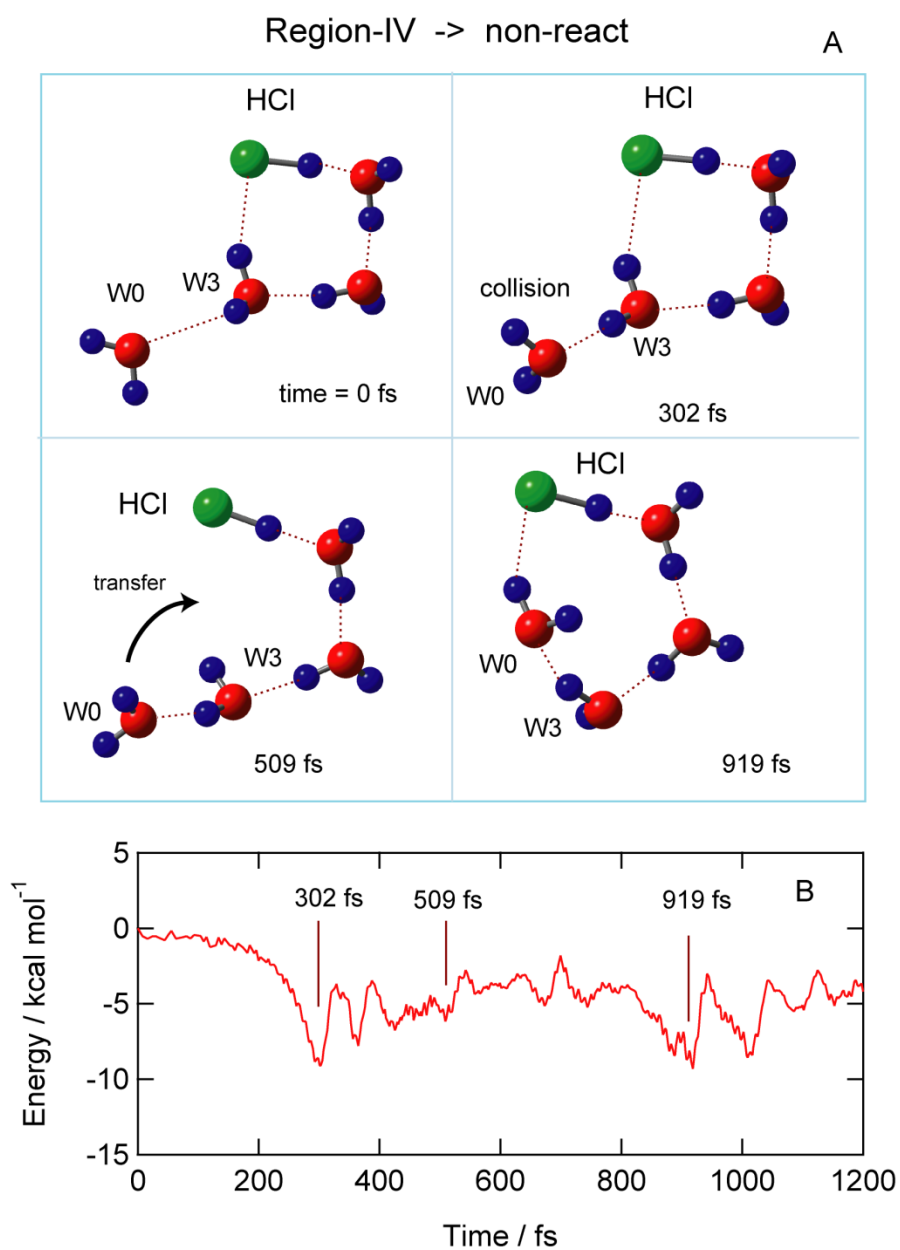

Figure S4. Sample of non-reactive trajectory: (A) Snapshots of HCl(H<sub>2</sub>O)<sub>n</sub> + H<sub>2</sub>O ( $n = 3+1$ ) reaction system given as a function of time, and (B) time evolutions of potential energy. H<sub>2</sub>O(W0) approaches to HCl from region-IV.

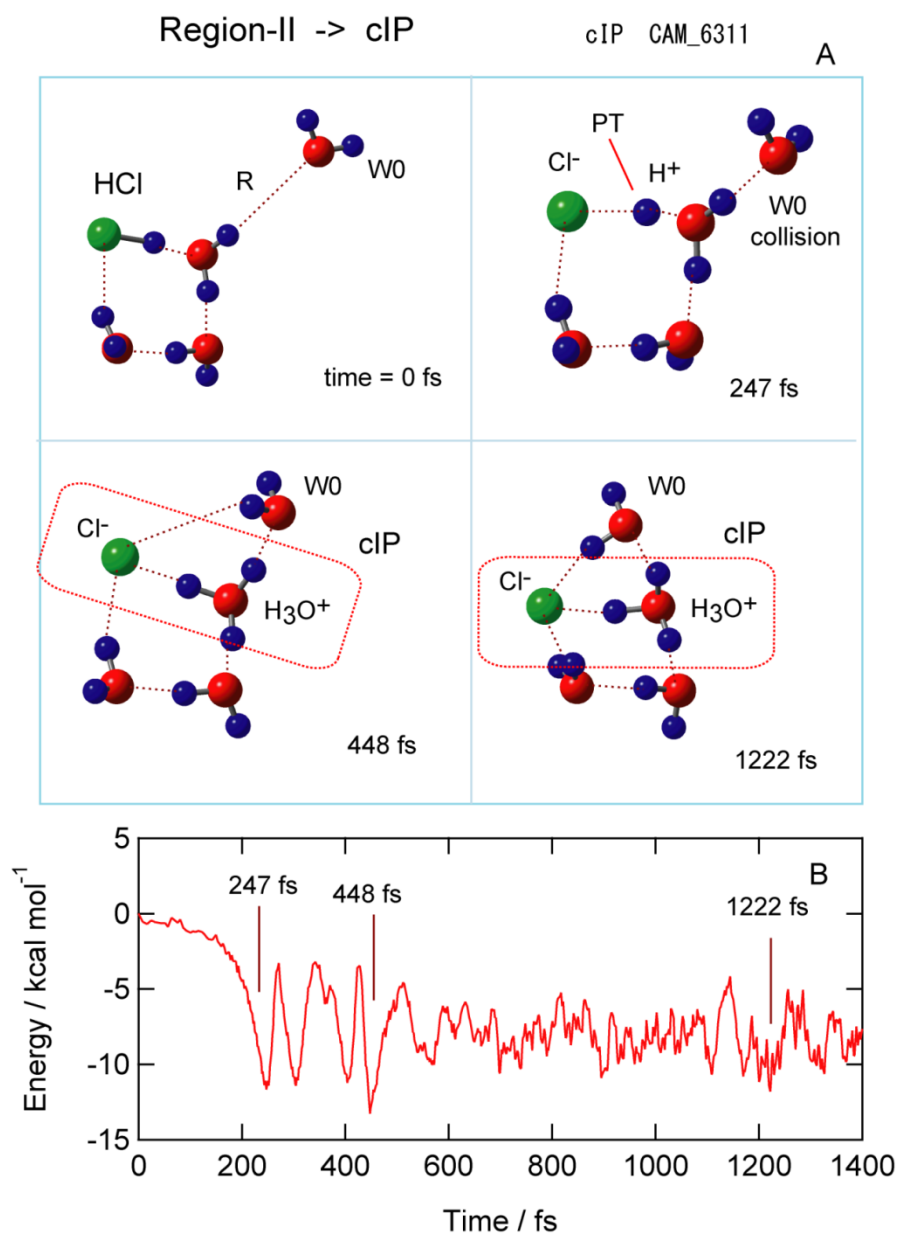

Figure S5. Sample trajectory of cIP (contact ion-pair) channel: (A) Snapshots of  $\text{HCl}(\text{H}_2\text{O})_n + \text{H}_2\text{O}$  ( $n = 3+1$ ) reaction system given as a function of time, and (B) time evolutions of potential energy.  $\text{H}_2\text{O}(\text{W0})$  approaches to HCl from region-II.



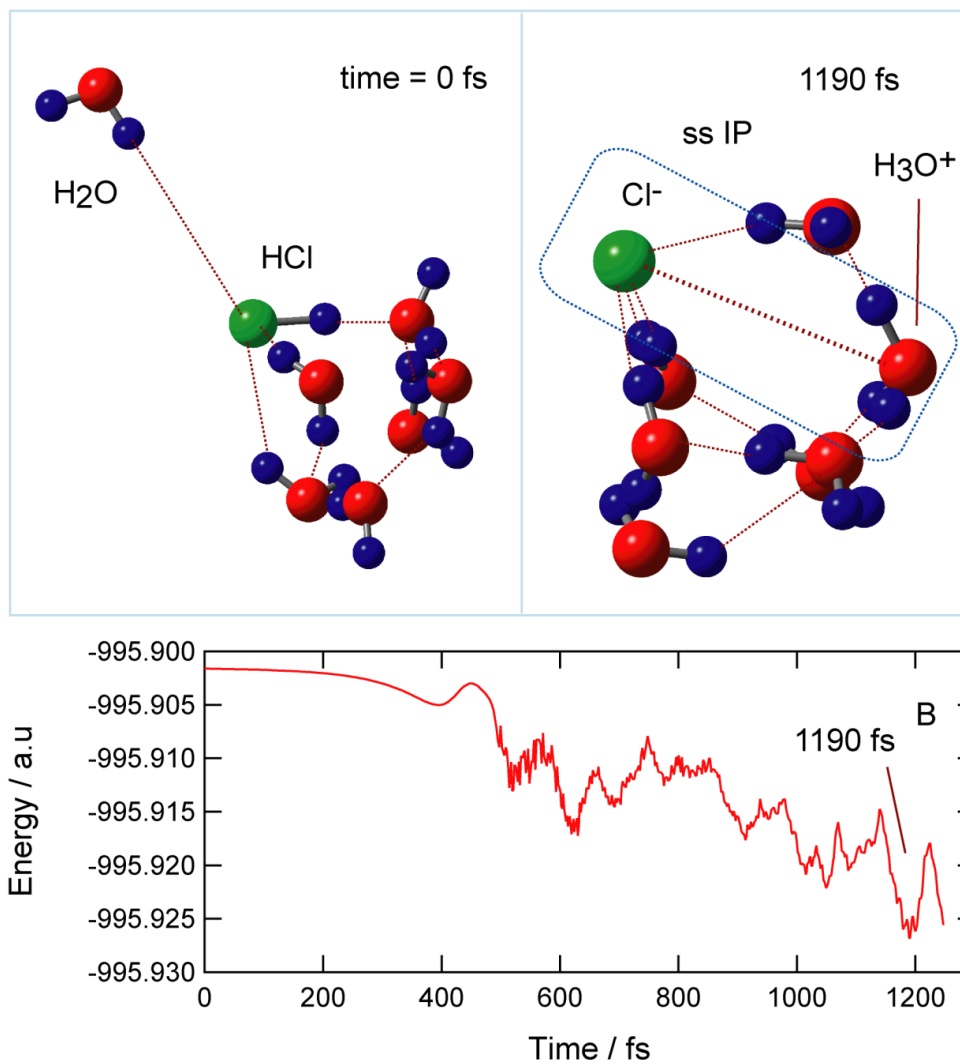

Figure S6. Sample trajectory for ssIP channel: (A) Snapshots of  $\text{HCl}(\text{H}_2\text{O})_n + \text{H}_2\text{O}$  ( $n = 6+1$ ) reaction system given as a function of time, and (B) time evolutions of potential energy.

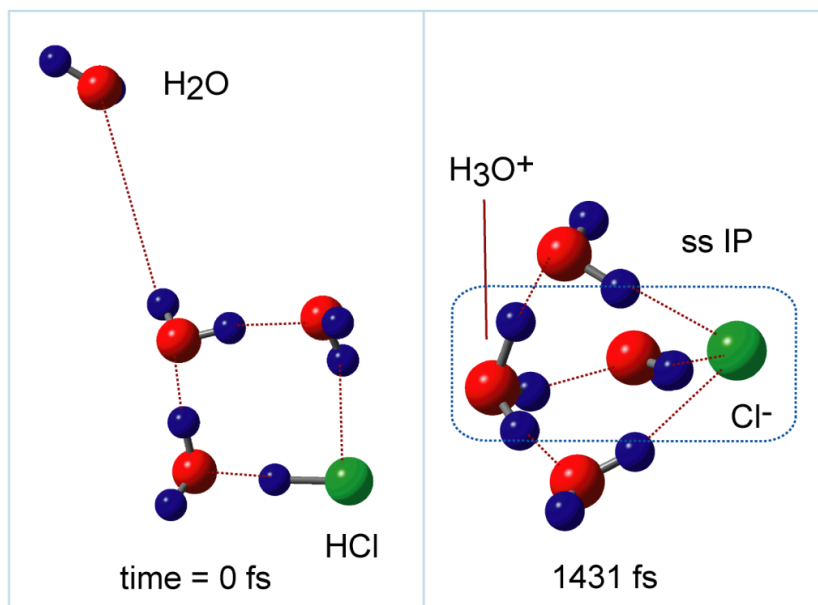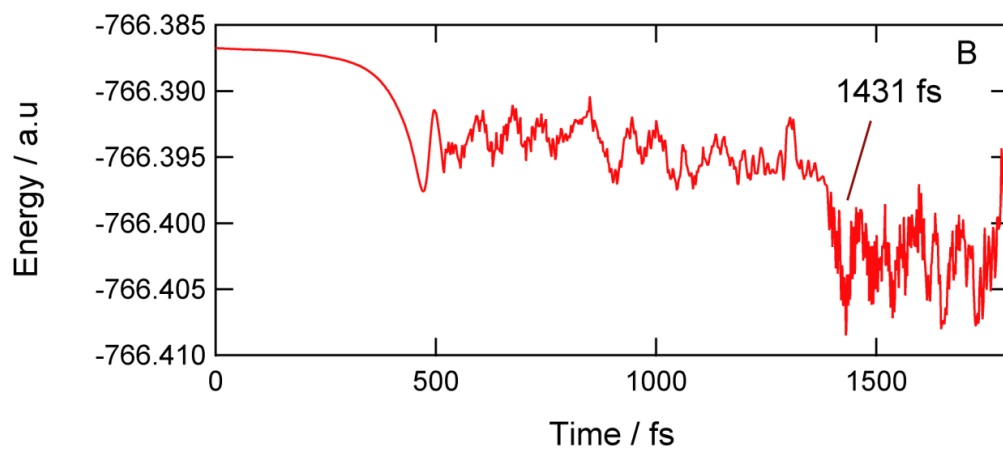

Figure S7. Effect of functional on reaction mechanism. Calculation was carried out at the wB97XD/6-31G(d) level. Sample trajectory of ssIP (solvent-separated ion-pair) channel: (A) Snapshots of  $\text{HCl}(\text{H}_2\text{O})_n + \text{H}_2\text{O}$  ( $n = 3+1$ ) reaction system given as a function of time, and (B) time evolutions of potential energy.  $\text{H}_2\text{O}(\text{W0})$  approaches to HCl from region-III.

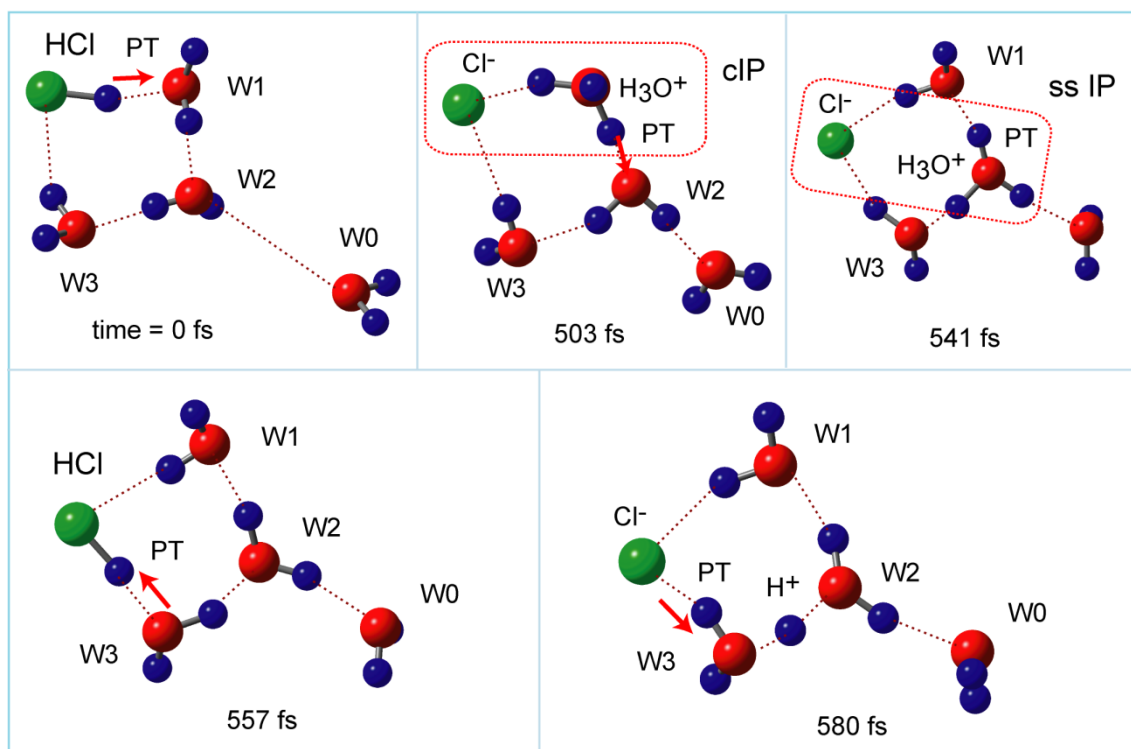

Figure S8. Effects of ZPE on reaction mechanism: snapshots of HCl(H<sub>2</sub>O)<sub>n</sub> + H<sub>2</sub>O (n = 3+1) reaction system given as a function of time. H<sub>2</sub>O(W0) approaches to HCl from region-III.
